# Supplementary material for: Rapid transformation of transparent conducting films into superhydrophobic conductive films
Source: Royal Society of Chemistry journal article supplement (doi:10.1039/c7ra00931c), 2017-01-01
Supplement: c7ra00931c1.pdf [file c7ra00931c1.pdf]

## Supplementary information

# Rapid transformation of transparent conducting films into superhydrophobic conductive films

Jong Seok Woo,<sup>a,b</sup> Geon-Woong Lee,<sup>a</sup> Soo-Young Park,<sup>b,\*</sup> Joong Tark Han<sup>a,\*</sup>

<sup>a</sup>Nano Hybrid Technology Research Center, Korea Electrotechnology Research Institute,  
Changwon 51543, Republic of Korea

<sup>b</sup> Major in Polymer Science and Engineering, School of Applied Chemical Engineering, Kyungpook  
National University, #1370 Sangyuk-dong, Buk-gu, Daegu 41566, Republic of Korea

\* Corresponding authors.

E-mail address: jthan@keri.re.kr (J. T. Han); psy@knu.ac.kr (S.-Y. Park)

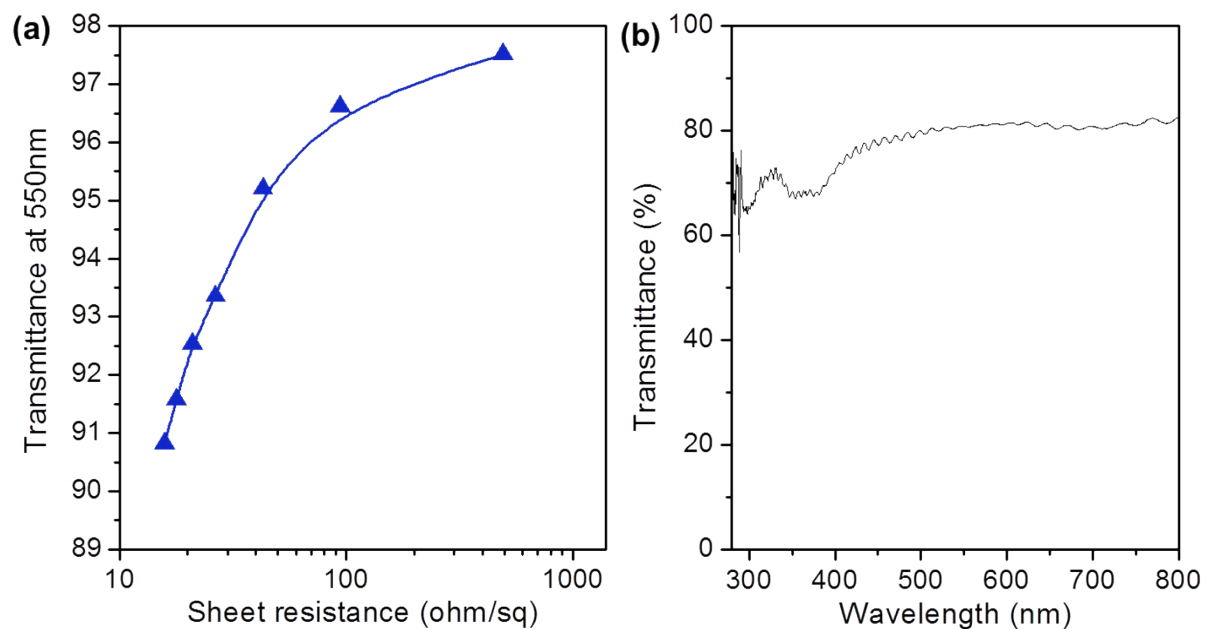

**Fig. S1.** (a) The sheet resistance and transmittance (excluding the substrate) plot for the AgNW/SWCNT film. (b) UV-Vis spectrum of the AgNW/SWCNT film on the polycarbonate substrate including the substrate (about 90% transmittance).
